# Supplementary material for: Aronia melanocarpa Extract Fermented by Lactobacillus plantarum EJ2014 Modulates Immune Response in Mice
Source: MDPI journal article supplement (doi:10.3390/antiox10081276), 2021-08-11
Supplement: s1 [file s1]

**Table S1.** The LOD and LOQ of minerals, and accuracy of mineral contents for SRM 1869

| <b>Targets</b> | <b>LOD<br/>(<math>\mu\text{g}/100\text{g}</math>)</b> | <b>LOQ<br/>(<math>\mu\text{g}/100\text{g}</math>)</b> | <b>Recovery (%)</b> | <b>RSD (%)</b> |
|----------------|-------------------------------------------------------|-------------------------------------------------------|---------------------|----------------|
| Potassium      | 1.43                                                  | 4.75                                                  | 99.9                | 0.6            |
| Calcium        | 2.63                                                  | 8.77                                                  | 101.8               | 1.4            |
| Magnesium      | 3.36                                                  | 1.12                                                  | 99.6                | 0.4            |
| Sodium         | 2.84                                                  | 9.47                                                  | 99.1                | 1.4            |
| Iron           | 0.30                                                  | 1.00                                                  | 101.0               | 0.8            |
| Phosphorus     | 1.01                                                  | 3.35                                                  | 101.2               | 0.1            |

The values are mean $\pm$ S.D of replicates

Relative standard deviation (RSD)

Reference value indicates the mineral contents of SRM 1869 provided by National Institute of Standard and Technology (NIST) as certificate value
